# Supplementary material
Source: PubMed Central journal article supplement (PMC6696926)

**SUPPLEMENTAL TABLES**

**Supplementary Table 1.** Descriptive characteristics of the Santiago Longitudinal Cohort Study participants. BMI – body mass index; BMIz – BMI Z-scores based on CDC reference

| N             |     | Weight |        | Height |       | BMI    |       | BMIz  |       | Obesity % |
|---------------|-----|--------|--------|--------|-------|--------|-------|-------|-------|-----------|
|               |     | Mean   | SD     | Mean   | SD    | Mean   | SD    | Mean  | SD    |           |
| <b>Age 5</b>  |     |        |        |        |       |        |       |       |       |           |
| Boys          | 302 | 22.180 | 3.849  | 1.138  | 0.044 | 17.042 | 2.238 | 0.858 | 1.048 | 19.8      |
| Girls         | 275 | 21.940 | 3.929  | 1.132  | 0.047 | 17.031 | 2.290 | 0.838 | 0.927 | 22.7      |
| Total         | 577 | 22.066 | 3.885  | 1.136  | 0.046 | 17.037 | 2.260 | 0.848 | 0.992 | 21.2      |
| <b>Age 10</b> |     |        |        |        |       |        |       |       |       |           |
| Boys          | 398 | 37.371 | 8.303  | 1.381  | 0.058 | 19.463 | 3.429 | 0.776 | 0.923 | 18.0      |
| Girls         | 372 | 37.635 | 8.362  | 1.389  | 0.066 | 19.354 | 3.307 | 0.638 | 0.913 | 14.6      |
| Total         | 770 | 37.499 | 8.327  | 1.385  | 0.062 | 19.410 | 3.369 | 0.709 | 0.920 | 16.3      |
| <b>Age 16</b> |     |        |        |        |       |        |       |       |       |           |
| Boys          | 284 | 69.243 | 14.223 | 1.715  | 0.062 | 23.525 | 4.477 | 0.468 | 1.052 | 13.8      |
| Girls         | 261 | 61.737 | 13.235 | 1.597  | 0.060 | 24.159 | 4.741 | 0.597 | 0.916 | 14.3      |
| Total         | 545 | 65.648 | 14.249 | 1.658  | 0.085 | 23.829 | 4.612 | 0.530 | 0.990 | 14.1      |

**Supplementary Table 2.** Multiple linear regression results of BMIz with GRS' and other covariates. R<sup>2</sup> – coefficient of determination; β – beta coefficient; SE – standard error, P – P-value.

| GRS     | R <sup>2</sup> | Adjusted R <sup>2</sup> | % variation in BMIz | β     | SE    | P       |
|---------|----------------|-------------------------|---------------------|-------|-------|---------|
| GRS_EUR | 3.72%          | 2.96%                   | 1.94%               | 0.055 | 0.014 | 9.6E-05 |
| GRS_SLS | 15.40%         | 14.74%                  | 13.63%              | 0.161 | 0.015 | 1.4E-26 |
| GRS_ALL | 11.41%         | 10.71%                  | 9.63%               | 0.091 | 0.010 | 7.3E-19 |

**SUPPLEMENTAL FIGURES**

**Supplementary Figure 1.** Scatterplots comparing BMIz calculated using CDC reference panel to those from A. UK (used in Felix et al.) and, B. WHO reference panels.

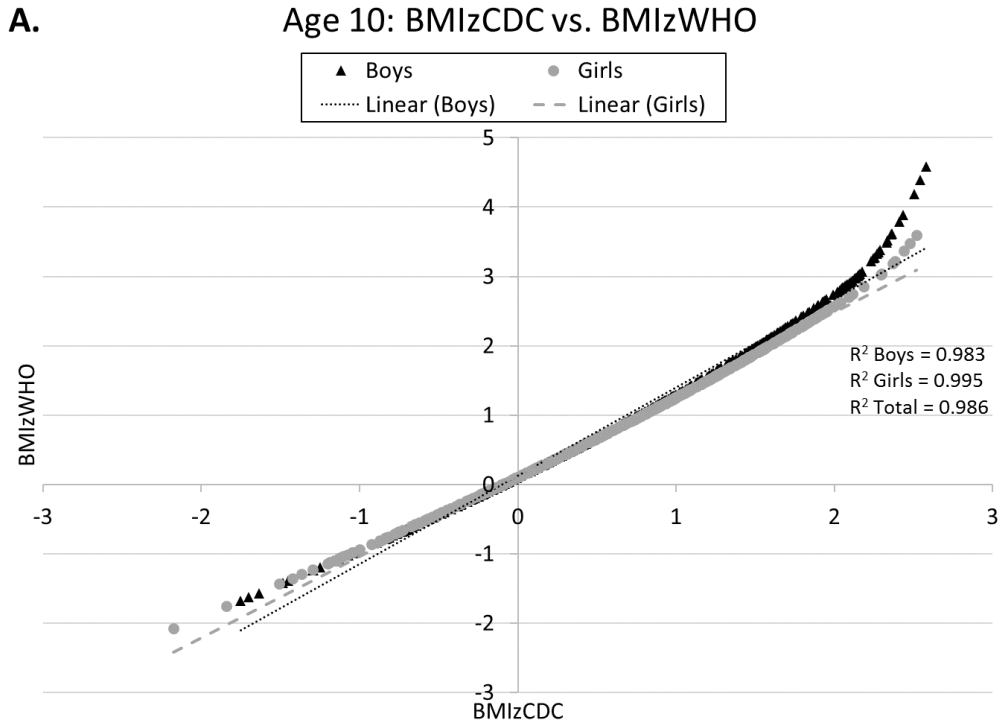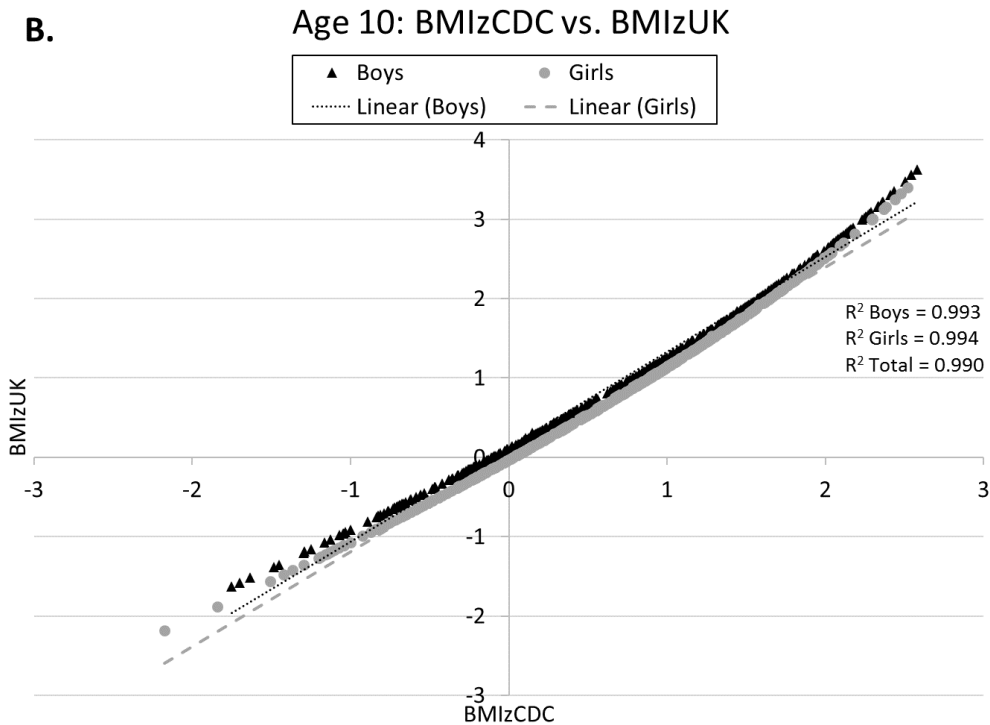

**Supplementary Figure 2.** Forest plot of each nominally significant locus ( $P < 0.05$  at ages 5, 10, and 16); estimated effect on BMI Z-score per effect allele by age. \*Significant positive trend ( $P < 0.0001$ ).

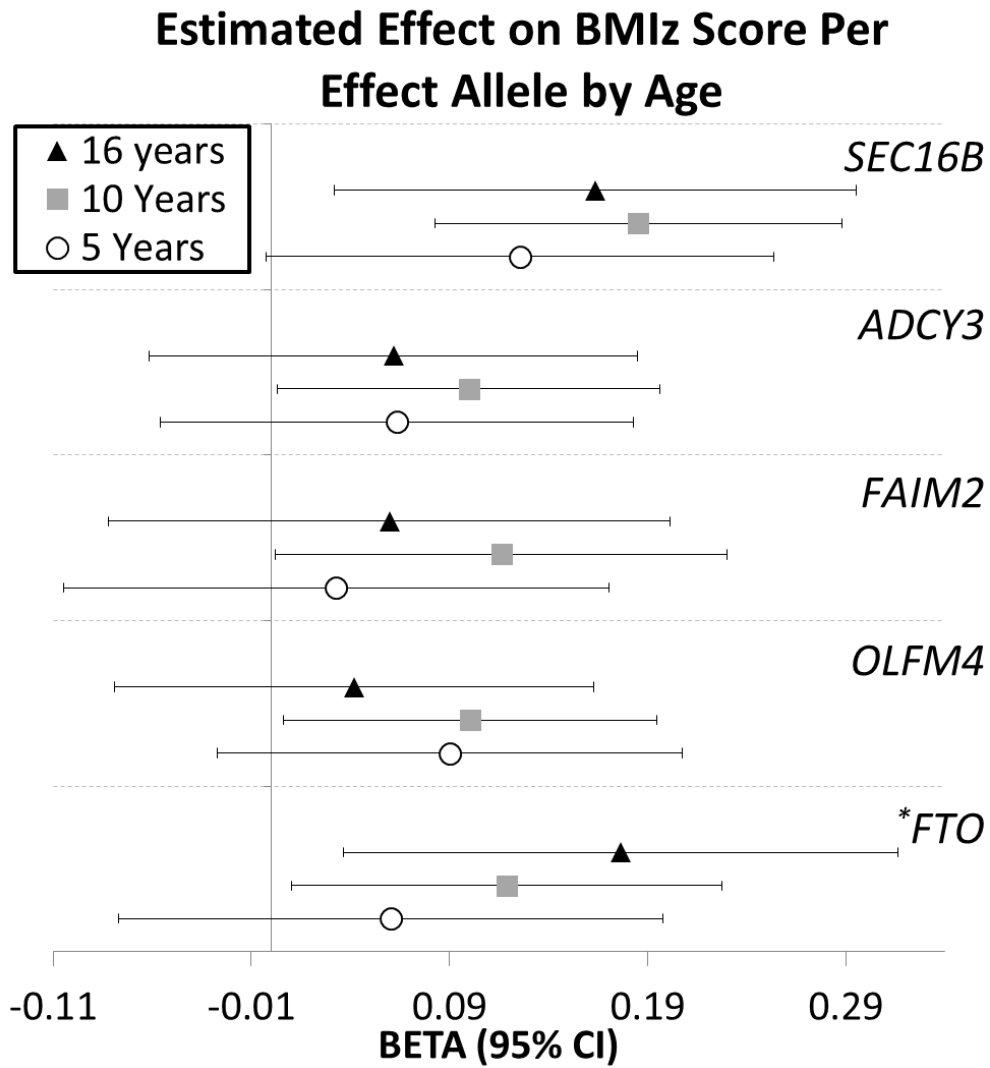

**Supplementary Figure 3.** Mean BMI Z-score plotted by genotype at the *SEC16B* and *FTO* loci at ages 5, 10, and 16. Dashed lines highlight the predicted additive effect of each allele on mean BMIz.

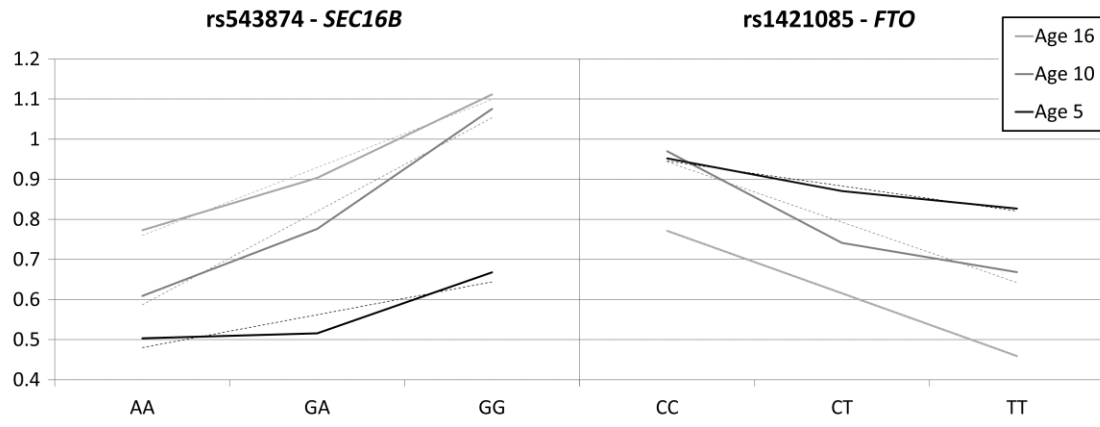

Supplement: NIHMS1042163-supplement-Supplemental_Information.pdf [file NIHMS1042163-supplement-Supplemental_Information.pdf]
